# Supplementary material for: Highly sensitive droplet digital PCR for detection of RET fusion in papillary thyroid cancer
Source: Springer Nature journal article supplement (doi:10.1186/s12885-023-10852-z), 2023-04-20

**A**

Uncropped gel for Figure 4 D

M H<sub>2</sub>O P4 P11 P28 P38 P43 P45 P57 P74 P76 P87 P97 M P13 P62 P96 P104

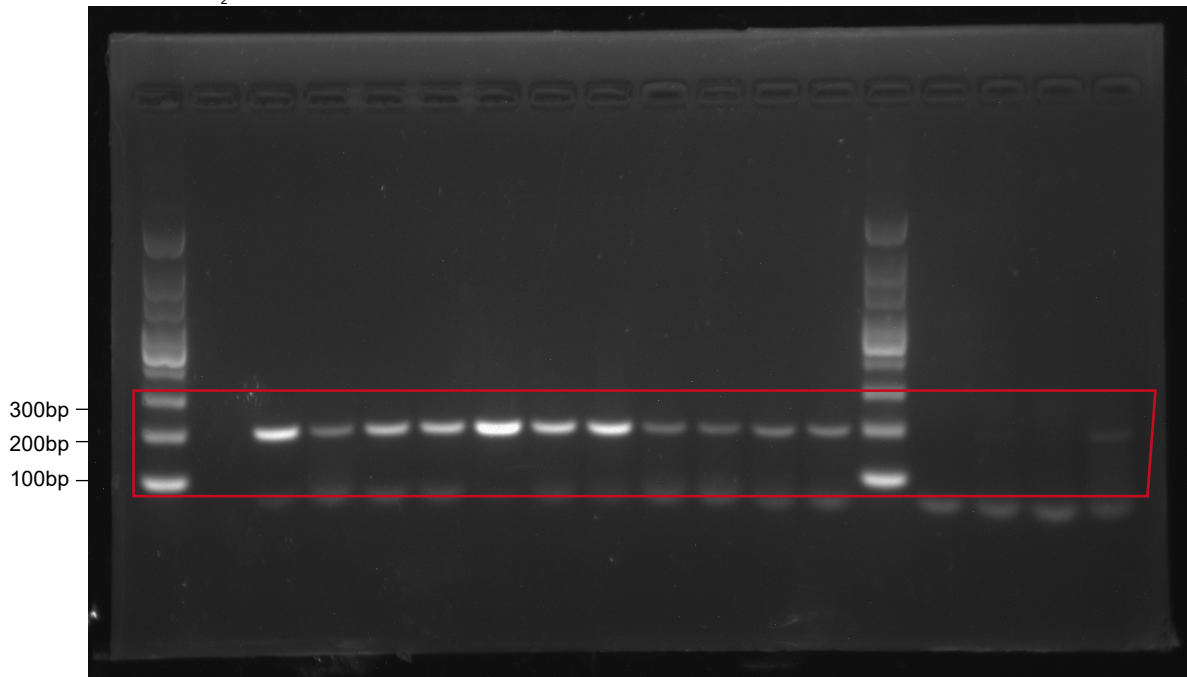

**B**

Uncropped gel for Figure 4 E

M H<sub>2</sub>O P13 P62 P96 P104 M

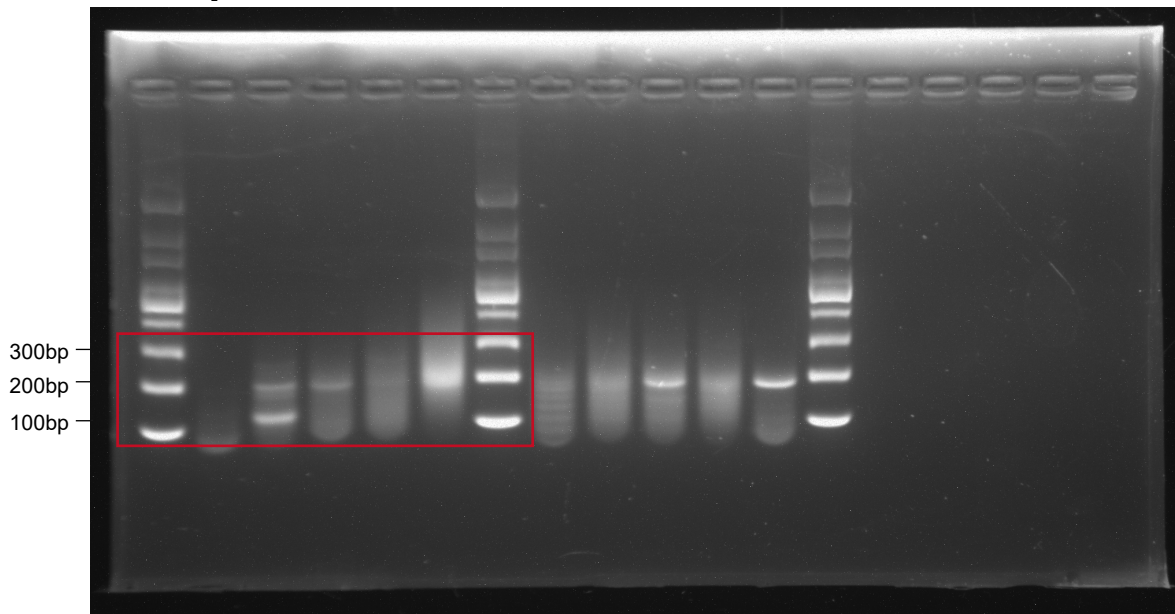

Supplement: MOESM1 [file 25264358]
